# Supplementary material for: Flow induced HeLa cell detachment kinetics show that oxygen-containing functional groups in graphene oxide are potent cell adhesion enhancers
Source: Royal Society of Chemistry journal article supplement (doi:10.1039/c8nr08994a), 2019-01-01
Supplement: c8nr08994a1.pdf [file c8nr08994a1.pdf]

## Electronic Supplementary Information

### **Flow induced HeLa cell detachment kinetics show that oxygen-containing functional groups in graphene oxide are potent cell adhesion enhancers**

*Jakub Vlček,<sup>a</sup> Lubomír Lapčík,<sup>\*a,b</sup> Markéta Havrdová,<sup>a</sup> Kateřina Poláková,<sup>a</sup> Barbora Lapčíková,<sup>a,b</sup> Tomáš Opletal,<sup>c</sup> Jens P. Froning<sup>a</sup> and Michal Otyepka<sup>a\*</sup>*

<sup>a</sup> Regional Centre of Advanced Technologies and Materials, Department of Physical Chemistry, Faculty of Science, Palacký University Olomouc, 17. listopadu 1192/12, 771 46 Olomouc, Czech Republic

<sup>b</sup> Tomas Bata University in Zlín, Faculty of Technology, Department of Food Technology, nám. T. G. Masaryka 275, 762 72 Zlín, Czech Republic

<sup>c</sup> Regional Centre of Advanced Technologies and Materials, Department of Analytical Chemistry, Faculty of Science, Palacký University Olomouc, 17. listopadu 1192/12, 771 46 Olomouc, Czech Republic

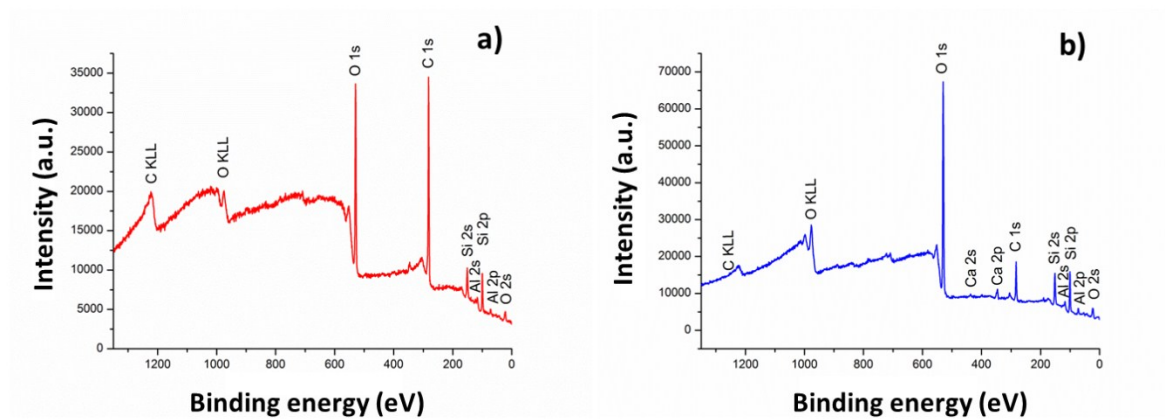

**Fig. S1** Measured XPS survey spectra of graphene (a) and GO formed by 20 s plasma treatment (b).

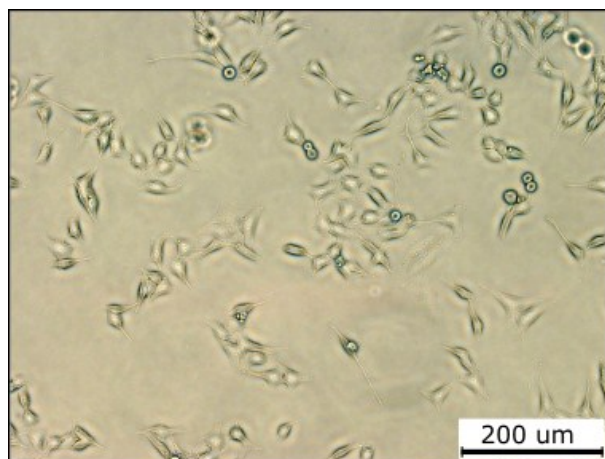

**Fig. S2** HeLa cells after 48 hours' cultivation on glass substrate. Image was acquired using an Olympus IX 70 microscope at 10× magnification. Inset scale bar: 200 μm.

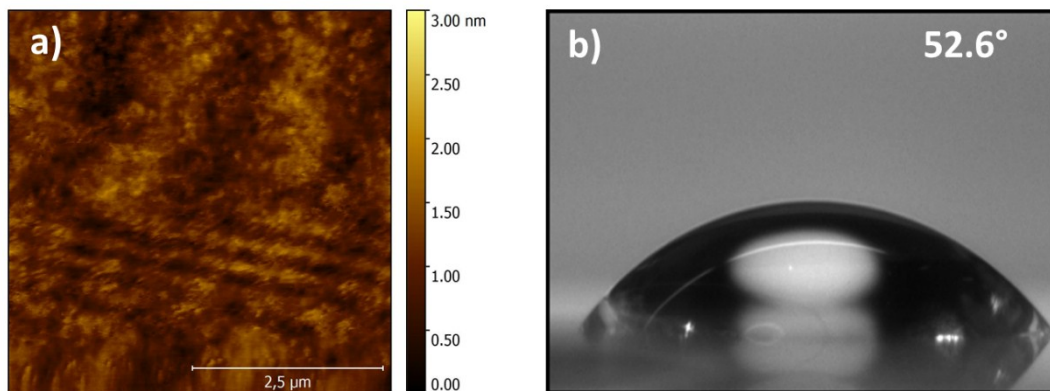

**Fig. S3** Topographic mapping image of the glass substrate obtained by AFM (a); image used to determine the static sessile drop contact angle of wetting for water on glass (b).

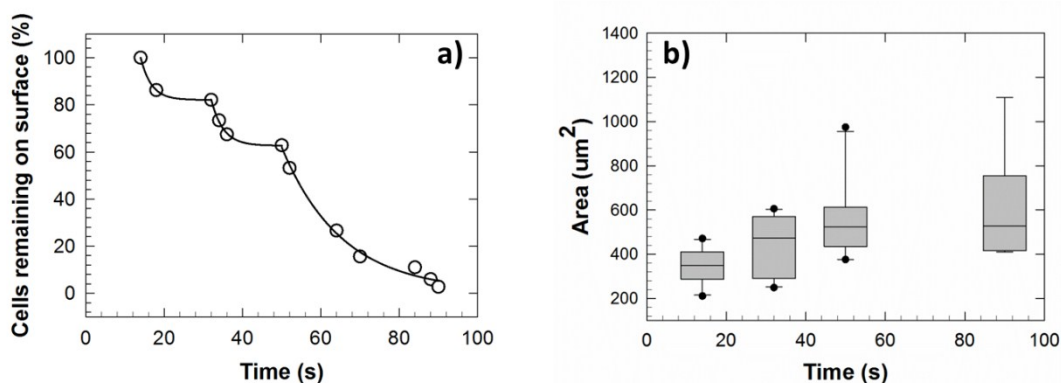

**Fig. S4** Impinging jet detachment kinetics of HeLa cells on glass surface (a). Experiments were performed with populations of hundreds of cells; the relationship between the projected areas of HeLa cells and their detachment time on glass substrate (b).
